# Supplementary material for: Responsible Sourcing Under Supplier-Auditor Collusion
Source: Atypon-hosted journal article supplement (doi:10.1287/msom.2019.0861), 2020-04-02
Supplement: msom.2019.0861.sm1.pdf [file msom.2019.0861.sm1.pdf]

# Online Appendix for “Responsible Sourcing under Supplier-Auditor Collusion”

Li Chen

Samuel Curtis Johnson Graduate School of Management, Cornell University, Ithaca, NY 14853  
li.chen@cornell.edu

Shiqing Yao

Monash Business School, Monash University, Melbourne, VIC 3145, Australia  
shiqing.yao@monash.edu

Kaijie Zhu

CUHK Business School, The Chinese University of Hong Kong, Shatin, Hong Kong  
kzhu@baf.msmail.cuhk.edu.hk

---

## Appendix A: Proofs for Main Results

**Proof (Lemma 1)** We first show that in equilibrium,  $p_1 \geq c\lambda$  and  $p_2 \leq c\lambda$ . Suppose  $p_1 < c\lambda$ . The buyer’s profit keeps unchanged by increasing  $p_1$  to  $c\lambda$  since the supplier never chooses to take the audit. Similarly, if  $p_2 > c\lambda$ , by reducing  $p_2$  to  $c\lambda$ , the buyer can lower the contract payment without changing the supplier’s behavior. Thus, it makes the buyer better off. Accordingly, the buyer’s optimal profit can be obtained by setting  $p_1 \geq c\lambda$  and  $p_2 \leq c\lambda$ .

Next, according to the assumption of  $l > 2v$ ,  $\int_0^{p_2/c} (v - l + lx - p_2) dx < 0$  for any  $p_2 > 0$ . Therefore, based on  $p_1 \geq c\lambda$  and  $p_2 \leq c\lambda$ , the buyer is better off by setting  $p_2 = 0$ . With this observation, the buyer’s problem can be simplified as  $\Pi^0 = \max_{c\lambda \leq p_1 \leq c} \Pi^0(\lambda, p_1, 0)$ , where  $\Pi^0(\lambda, p_1, 0) = \int_{\lambda}^{\frac{p_1}{c}} (v - l + lx - p_1) dx$ . We can compute  $\Pi^0(\lambda, p, 0) - \Pi^0(\lambda + 1 - \frac{p}{c}, c, 0) = (\frac{l}{c} - 1)(\frac{p}{c} - \lambda)(p - c) < 0$  for any  $c\lambda \leq p < c$ , which indicates the buyer’s equilibrium contract payment must be  $p_1^0 = c$ . Furthermore, by noting  $\frac{\partial^2 \Pi^0(\lambda, c, 0)}{\partial \lambda^2} < 0$ , we obtain the equilibrium process quality requirement as  $\lambda^0 = 1 - \frac{v-c}{l}$ . Hence,  $\Pi^0 = \frac{(v-c)^2}{2l}$ .  $\square$

**Proof (Proposition 1)** We divide the proof into three steps. First, we show that when collusion is possible, the buyer’s optimal profit can be obtained by setting  $p_2 \leq c\lambda$ . Suppose  $p_2 > c\lambda$ . Note that the supplier with process quality level  $x < p_2/c$  will contract with the buyer because  $p_2 - cx \geq 0$  whilst the supplier with process quality level  $x > p_2/c$  will contract with the buyer with payment  $p_1$  since  $p_1 \geq p_2$ . Hence, increasing  $\lambda$  will not impact the supplier’s participation decision but may

make the supplier choose to contract with the buyer with payment  $p_2$ , reducing the buyer's expected contract payment and thus making the buyer better off. Therefore, the buyer's optimal profit can be obtained by setting  $p_2 \leq c\lambda$ .

Second, we show that the buyer's optimal profit can be obtained by setting  $p_1 \geq c\lambda$ . Suppose that  $p_1 < c\lambda$ . In that case, if  $K > c/\varphi$  and  $x < \lambda$ , the gain from collusion is  $p_1 - cx - \varphi K(\lambda - x) = (\varphi K - c)x + p_1 - \varphi K\lambda < (\varphi K - c)(x - \lambda) < 0$ . That means that no supplier is willing to contract with the buyer with payment  $p_1$ . Therefore, the buyer's optimal profit can only be obtained by setting  $p_1 \geq c\lambda$  when  $K > c/\varphi$ . Suppose  $K \leq c/\varphi$ . In this case, the substandard supplier will contract with the buyer with payment  $p_1$  if and only if  $p_1 - cx - \varphi K(\lambda - x) \geq (p_2 - cx)^+$ . From that, it can be shown that there must exist a  $\xi > 0$  such that the buyer's profit is less than or equal to  $(1 - \gamma) \int_0^{p_2/c} (v - l(1 - x) - p_2) dx + \gamma \int_0^\xi (v - l(1 - x)) dx$ . Because  $l > 2v$ , the buyer's profit must be less than zero. Accordingly, the buyer's optimal profit can be obtained by setting  $p_1 \geq c\lambda$ .

Third, based on the above results (i.e.,  $p_1 \geq c\lambda \geq p_2$ ), the remaining discussion can be divided into three cases. We first consider the case  $\lambda < \frac{p_1 - p_2}{\varphi K}$ . In that case, we have  $p_1 - cx - \varphi K(\lambda - x) \geq p_2 - cx$ , which implies that  $p_1 - cx - \varphi K(\lambda - x) \geq 0$  for all  $0 \leq x \leq \lambda$  and the supplier with process quality level lower than  $p_2/c$  will contract with the buyer through collusion. Accordingly, the buyer's profit can be expressed as  $\int_\lambda^{\min(1, p_1/c)} (v - l(1 - x) - p_1) dx + (1 - \gamma) \int_0^{p_2/c} (v - l(1 - x) - p_2) dx + \gamma \int_0^\lambda (v - l(1 - x) - p_1) dx$ . Apparently, by reducing  $p_2$  to 0, the inequality  $\lambda < \frac{p_1 - p_2}{\varphi K}$  still holds while the buyer's profit increases, which contradicts the optimality. Secondly, we consider the case  $\lambda - \frac{p_1 - p_2}{\varphi K} \geq \frac{p_2}{c}$ . In that case, it can be shown that  $K > c/\varphi$  and the buyer's profit function can be written as  $\int_\lambda^{\min(1, p_1/c)} (v - l(1 - x) - p_1) dx + \int_0^{p_2/c} (v - l(1 - x) - p_2) dx + \gamma \int_{\frac{\varphi K \lambda - p_1}{\varphi K - c}}^\lambda (v - l(1 - x) - p_1) dx$ . Apparently, by reducing  $p_2$  to 0, the inequality  $\lambda - \frac{p_1 - p_2}{\varphi K} \geq \frac{p_2}{c}$  still holds while the buyer's profit increases. Thirdly, we consider the most complicated case  $0 \leq \lambda - \frac{p_1 - p_2}{\varphi K} < \frac{p_2}{c}$ . In this case, the buyer's profit function can be expressed as  $\Pi(\lambda, p_1, p_2) = \int_\lambda^{\min(1, p_1/c)} (v - l(1 - x) - p_1) dx + (1 - \gamma) \int_0^{p_2/c} (v - l(1 - x) - p_2) dx + \gamma \int_{\lambda - \frac{p_1 - p_2}{\varphi K}}^\lambda (v - l(1 - x) - p_1) dx + \gamma \int_0^{\lambda - \frac{p_1 - p_2}{\varphi K}} (v - l(1 - x) - p_2) dx$ . It can be shown that  $p_1 \leq c$  (otherwise, the buyer can be better off reducing  $p_1$  slightly). Therefore,  $\min(1, p_1/c) = p_1/c$ . Consider two subcases,  $K \leq c/\varphi$  and  $K > c/\varphi$ . Subcase 1:  $K \leq c/\varphi$ . It can be shown that  $\Pi(\lambda, p_1, p_2) \leq \int_0^{p_1/c} (v - l + lx) dx - (1 - \gamma) \int_{p_2/c}^\lambda (v - l + lx) dx = \frac{p_1}{c} [v - l + \frac{l}{2} \frac{p_1}{c}] - (1 - \gamma) (\lambda - \frac{p_2}{c}) [v - l + \frac{l}{2} (\lambda + \frac{p_2}{c})]$ . Note that  $v - l + \frac{l}{2} \frac{p_1}{c} < 0$  and  $\lambda - \frac{p_2}{c} > 0$ . Hence, if  $v - l + \frac{l}{2} (\lambda + \frac{p_2}{c}) \geq 0$ , then  $\Pi(\lambda, p_1, p_2) \leq 0$  and then a contradiction. If  $v - l + \frac{l}{2} \frac{p_1}{c} < 0$ ,  $\Pi(\lambda, p_1, p_2) < \frac{p_1}{c} [v - l + \frac{l}{2} \frac{p_1}{c}] - \frac{p_1}{c} [v - l + \frac{l}{2} (\lambda + \frac{p_2}{c})] = \frac{p_1}{c} \frac{l}{2} [\frac{p_1 - p_2}{c} - \lambda] \leq \frac{p_1}{c} \frac{l}{2} [\frac{p_1 - p_2}{\varphi K} - \lambda]$ . Since  $\lambda - \frac{p_1 - p_2}{\varphi K} \geq 0$ ,  $\Pi(\lambda, p_1, p_2) < 0$ . Subcase 2:  $K > c/\varphi$ . Let us consider shutout contract  $(\lambda', p_1, 0)$ , where  $\lambda' = \lambda + \frac{c}{\varphi K} \left( \frac{p_2}{c} - \left( \lambda - \frac{p_1 - p_2}{\varphi K} \right) \right) > \lambda$ . We will show this constructed contract yields

higher profit. Note that under the collusive state, the profit increases, because the supplier with process quality lower than  $\lambda - \frac{p_1 - p_2}{\varphi K}$  is shut out and the supplier with process quality higher than  $\lambda - \frac{p_1 - p_2}{\varphi K}$  contracts with the buyer. Under the non-collusive state, the increased profit by using the shutout contract is  $\Delta = -\int_{\lambda}^{\lambda'} (v - l + lx - p_1) dx - \int_0^{p_2/c} (v - l + lx - p_2) dx$ . Hence,  $\Delta > -\int_{\lambda}^{\lambda'} (v - l + lx) dx - \int_0^{p_2/c} (v - l + lx) dx = -\int_0^{\lambda'} (v - l + lx) dx + \int_{p_2/c}^{\lambda} (v - l + lx) dx = -\lambda' [v - l + \frac{1}{2}\lambda'] + (\lambda - \frac{p_2}{c}) [v - l + \frac{1}{2}(\lambda + \frac{p_2}{c})]$ . Note that  $v - l + \frac{1}{2}\lambda < 0$  and  $\lambda > \frac{p_2}{c}$ . If  $v - l + \frac{1}{2}(\lambda + \frac{p_2}{c}) > 0$ , then  $\Delta > 0$  and hence a contradiction. Suppose  $v - l + \frac{1}{2}(\lambda + \frac{p_2}{c}) \leq 0$ ,  $\Delta \geq -\lambda' [v - l + \frac{1}{2}\lambda'] + \lambda' [v - l + \frac{1}{2}(\lambda + \frac{p_2}{c})] = -\lambda' \frac{l}{2} [\lambda' - \lambda - \frac{p_2}{c}] = -\lambda' \frac{l}{2} \left[ \frac{c - \varphi K}{\varphi K} \frac{p_2}{c} - \frac{c}{\varphi K} \left( \lambda - \frac{p_1 - p_2}{\varphi K} \right) \right]$ . Since  $\frac{c - \varphi K}{\varphi K} < 0$  and  $\lambda - \frac{p_1 - p_2}{\varphi K} \geq 0$ , we also have  $\Delta > 0$ . Therefore, the shutout contract  $(\lambda', p_1, 0)$  dominates  $(\lambda, p_1, p_2)$ . Thus, the result follows.  $\square$

**Proof (Lemma 2)** The result is straightforward to prove when the state is not collusive. Now assume that the state is collusive. Then, a supplier with process quality level  $x \geq \lambda$  will participate when the production cost is no more than the contract payment, i.e.,  $cx \leq p$ . Thus, a supplier with process quality  $\lambda \leq x \leq \frac{p}{c}$  will participate. On the other hand, a supplier with process quality  $x < \lambda$  will collude and participate if the condition  $p - cx - \varphi K(\lambda - x) \geq 0$  holds, for which we discuss two cases. Case 1:  $K > c/\varphi$ . In this case, we obtain that  $p - cx - \varphi K(\lambda - x) \geq 0$  is equivalent to  $x \geq \lambda - \frac{p - c\lambda}{\varphi K - c}$ . Case 2:  $K \leq c/\varphi$ . In this case, we can show that  $p - cx - \varphi K(\lambda - x) \geq c\lambda - cx - \varphi K(\lambda - x) = (c - \varphi K)(\lambda - x) \geq 0$  holds. Thus, the result follows.  $\square$

**Proof (Proposition 2)** We first consider the case:  $K > c/\varphi$ . We will show that the equilibrium payment is  $p^* = c$  by the following two claims.

*Claim 1: In equilibrium,  $p^* \leq c$ . Proof.* We prove the claim by contradiction. Consider the equilibrium  $(\lambda^*, p^*)$  and assume  $p^* > c$ . We show below that the solution is inferior to another, leading to a contradiction. We discuss two cases. Case 1:  $p^* > \varphi K\lambda^*$ . In this case, the buyer's profit function is

$$\Pi(\lambda, p) = (1 - \gamma) \int_{\lambda}^1 (v - l(1 - x) - p) dx + \gamma \int_0^1 (v - l(1 - x) - p) dx.$$

We can compute  $\frac{\partial \Pi(\lambda^*, p^*)}{\partial p} = -1 < 0$ , which implies that the buyer is better off reducing the payment  $p^*$  slightly. Hence, a contradiction. Case 2:  $p^* \leq \varphi K\lambda^*$ . In this case, the buyer's profit function is

$$\Pi(\lambda, p) = (1 - \gamma) \int_{\lambda}^1 (v - l(1 - x) - p) dx + \gamma \int_{\frac{\varphi K\lambda - p}{\varphi K - c}}^1 (v - l(1 - x) - p) dx,$$

from which we can compute

$$\frac{\partial \Pi(\lambda, p)}{\partial p} = -(1 - \gamma)(1 - \lambda) - \gamma \left( 1 - \frac{\varphi K\lambda - p}{\varphi K - c} \right)$$

$$\begin{aligned} & +\gamma \frac{1}{\varphi K - c} \left[ v - l \left( 1 - \frac{\varphi K \lambda - p}{\varphi K - c} \right) - p \right] \\ \frac{\partial \Pi(\lambda, p)}{\partial \lambda} & = -(1 - \gamma)(v - l(1 - \lambda) - p) \\ & - \gamma \frac{\varphi K}{\varphi K - c} \left[ v - l \left( 1 - \frac{\varphi K \lambda - p}{\varphi K - c} \right) - p \right]. \end{aligned}$$

Then we divide the discussion into two subcases. Subcase 1:  $p^* = \varphi K \lambda^*$ . In this subcase, we have  $\frac{\partial \Pi(\lambda^*, p^*)}{\partial p} = -(1 - \gamma)(1 - \lambda) - \gamma + \frac{\gamma}{\varphi K - c}(v - l - p^*) < 0$ , due to  $l > v$ . Thus, the buyer will be better off reducing the payment  $p^*$  slightly, which leads to a contradiction. Subcase 2:  $p^* < \varphi K \lambda^*$ . In this subcase, due to the optimality of  $(\lambda^*, p^*)$ , we have  $\frac{\partial \Pi(\lambda^*, p^*)}{\partial \lambda} \geq 0$  (more specifically,  $\frac{\partial \Pi(\lambda^*, p^*)}{\partial \lambda} = 0$  when  $\frac{p^*}{\varphi K} < \lambda^* < 1$ , and  $\frac{\partial \Pi(\lambda^*, p^*)}{\partial \lambda} \geq 0$  when  $\lambda^* = 1$ ). Then, a detailed investigation of  $\frac{\partial \Pi(\lambda^*, p^*)}{\partial \lambda}$  indicates  $\frac{\varphi K}{\varphi K - c} \left[ v - l \left( 1 - \frac{\varphi K \lambda - p}{\varphi K - c} \right) - p \right] < 0$  because  $v - l(1 - \lambda) - p > v - l \left( 1 - \frac{\varphi K \lambda - p}{\varphi K - c} \right) - p > v - l \left( 1 - \frac{\varphi K \lambda - p}{\varphi K - c} \right) - p$ , where the inequalities come from  $p > c \geq c\lambda$ . As a result,  $\frac{\partial \Pi(\lambda^*, p^*)}{\partial p} < 0$ . That is, the buyer is better off reducing the payment  $p^*$  slightly. Hence, a contradiction.

*Claim 2: In equilibrium,  $p^* \geq c$ . Proof.* We prove the claim by contradiction. Consider the equilibrium  $(\lambda^*, p^*)$  and assume  $p^* < c$ . We will show below that the solution is inferior to another, leading to a contradiction. To that end, we discuss two cases. Case 1:  $p^* < \varphi K \lambda^*$ . In this case, the buyer's profit function is

$$\Pi(\lambda, p) = (1 - \gamma) \int_{\lambda}^{\frac{p}{c}} (v - l(1 - x) - p) dx + \gamma \int_{\frac{\varphi K \lambda - p}{\varphi K - c}}^{\frac{p}{c}} (v - l(1 - x) - p) dx.$$

We will show  $\Pi(\lambda^*, p^*) < \Pi\left(\lambda^* + 1 - \frac{p^*}{c}, c\right)$ . To that end, we define

$$g(m) \triangleq \Pi\left(\lambda^* + m \left(1 - \frac{p^*}{c}\right), p^* + m(c - p^*)\right).$$

Thus, we aim to show equivalently  $g(0) < g(1)$ . By the Mean Value Theorem and the chain rule, we obtain that there exists  $\tau \in (0, 1)$  such that

$$\begin{aligned} g(1) - g(0) & = \frac{\partial \Pi\left(\lambda^* + \tau \left(1 - \frac{p^*}{c}\right), p^* + \tau(c - p^*)\right)}{\partial \lambda} \left(1 - \frac{p^*}{c}\right) \\ & \quad + \frac{\partial \Pi\left(\lambda^* + \tau \left(1 - \frac{p^*}{c}\right), p^* + \tau(c - p^*)\right)}{\partial p} (c - p^*) \\ & = \left[ (1 - \gamma) + \gamma \frac{\varphi K}{\varphi K - c} \right] \left(\frac{l}{c} - 1\right) \left(\frac{p^* + \tau(c - p^*)}{c} - \lambda^*\right) (c - p^*) > 0 \end{aligned}$$

where the inequality comes from  $l > c$ ,  $c > p^*$ , and  $p^* \geq c\lambda^*$ . Hence, compared to  $(\lambda^*, p^*)$ , the buyer is better off with  $\left(\lambda^* + 1 - \frac{p^*}{c}, c\right)$ , which leads to a contradiction. Case 2:  $p^* > \varphi K \lambda^*$ . In this case, the buyer's profit function is

$$\Pi(\lambda, p) = (1 - \gamma) \int_{\lambda}^{\frac{p}{c}} [v - l(1 - x) - p] dx + \gamma \int_0^{\frac{p}{c}} [v - l(1 - x) - p] dx.$$

Then we divide the discussion into two subcases. Subcase 1:  $\lambda^* > 0$ . In this subcase, the optimal solution  $(\lambda^*, p^*)$  is an interior point of the region  $\{(\lambda, p) : p < c, \lambda > 0, p > \varphi K \lambda\}$ . Thus, the Hessian matrix  $\nabla^2 \Pi(\lambda^*, p^*)$  should be negative semi-definite, for which a necessary condition is  $|\nabla^2 \Pi(\lambda^*, p^*)| \geq 0$ , or equivalently,

$$\frac{\partial^2 \Pi(\lambda^*, p^*)}{\partial \lambda^2} \frac{\partial^2 \Pi(\lambda^*, p^*)}{\partial p^2} - \left[ \frac{\partial^2 \Pi(\lambda^*, p^*)}{\partial \lambda \partial p} \right]^2 = -(1-\gamma) l \frac{l-2c}{c^2} - (1-\gamma)^2 \geq 0.$$

However, the above inequality never holds since  $l > 2c$ . Hence, a contradiction. Subcase 2:  $\lambda^* = 0$ . Note we have  $\frac{\partial \Pi(0, p^*)}{\partial \lambda} = (1-\gamma)[(l-v) + p^*] > 0$ , which implies that the buyer can be better off increasing the value of  $\lambda$  slightly. Hence, a contradiction as well. In short, Claim 2 holds, that is, the buyer's payment  $p^*$  is no less than  $c$ .

Next, we proceed to solve for the equilibrium supplier process quality requirement  $\lambda^*$ . We consider two cases,  $\varphi K \lambda \geq c$  and  $\varphi K \lambda \leq c$ , for which the respective optimizations that maximize the buyer's profit are

$$\max_{\lambda \geq \frac{c}{\varphi K}} \left\{ (1-\gamma) \int_{\lambda}^1 (v-c-l(1-x)) dx + \gamma \int_{\frac{\varphi K \lambda - c}{\varphi K - c}}^1 (v-c-l(1-x)) dx \right\},$$

and

$$\max_{\lambda \leq \frac{c}{\varphi K}} \left\{ (1-\gamma) \int_{\lambda}^1 (v-c-l(1-x)) dx + \gamma \int_0^1 (v-c-l(1-x)) dx \right\}.$$

The unconstrained solution to the first optimization is  $\lambda_1 := 1 - \frac{(\varphi K - c + \gamma c)(\varphi K - c)}{(\varphi K - c + \gamma c)(\varphi K - c) + \gamma \varphi K c} \cdot \frac{v-c}{l}$ , which yields a payoff of  $\Pi_1 := \frac{(\varphi K - c + \gamma c)^2 l}{(\varphi K - c + \gamma c)^2 l + \gamma (l - \gamma) c^2} \cdot \frac{(v-c)^2}{2l}$ . The unconstrained solution to the second optimization is  $\lambda_2 := 1 - \frac{v-c}{l}$ , which yields a payoff of  $\Pi_2 := (1-\gamma) \frac{(v-c)^2}{2l} - \gamma \frac{l-2(v-c)}{2}$ . Note that it is straightforward to prove  $\lambda_2 < \lambda_1$ . Based on it, our discussion can be divided into three cases. Case 1:  $\lambda_2 < \frac{c}{\varphi K} < \lambda_1$ . In this case, the buyer's profit function is bimodal in  $\lambda$ . Thus, we need to compare  $\Pi_1$  and  $\Pi_2$ . One can show that the optimal process quality requirement is  $\lambda^* = \lambda_1$  if  $\frac{\varphi K(2c-2\gamma c-\varphi K)}{(1-\gamma)lc^2} \leq \frac{l-2v+2c}{(l-v+c)^2}$ . Case 2:  $\frac{c}{\varphi K} \leq \lambda_2 < \lambda_1$ . The buyer's profit function is unimodal in  $\lambda$ . In this case, the optimal process quality requirement is  $\lambda^* = \lambda_1$ . In this case,  $\frac{\varphi K(2c-2\gamma c-\varphi K)}{(1-\gamma)lc^2} \leq \frac{l-2v+2c}{(l-v+c)^2}$ . Case 3:  $\lambda_2 < \lambda_1 \leq \frac{c}{\varphi K}$ . The buyer's profit function has two maximal points in  $\lambda$ . Thus, the optimal quality requirement is  $\lambda^* = \lambda_2$ . In this case,  $\frac{\varphi K(2c-2\gamma c-\varphi K)}{(1-\gamma)lc^2} > \frac{l-2v+2c}{(l-v+c)^2}$ . Note that  $\frac{\varphi K(2c-2\gamma c-\varphi K)}{(1-\gamma)lc^2} \leq \frac{l-2v+2c}{(l-v+c)^2}$  is equal to  $\gamma > \underline{\gamma}(K)$  when  $K > c/\varphi$ . Moreover, it's easy to see that when  $\lambda^* = \lambda_1$ ,  $\lambda^*$  is decreasing in  $K$  and increasing in  $\gamma$ . Combining the above results, we can obtain the desired result for  $K > c/\varphi$ .

Finally, we examine the case in which  $K \leq c/\varphi$ . We can show that the equilibrium payment  $p^* = c$  continues to hold for this case by following the proof stated above. In addition, due to  $K \leq c/\varphi$ , the buyer's profit function is  $\Pi_2$  if it yields a positive value. Therefore, the buyer's

equilibrium profit is  $\Pi_2$  and the equilibrium process quality requirement is  $\lambda^* = \lambda_2$  if  $\Pi_2 > 0$ , or equivalently, if  $\gamma > \bar{\gamma}(K)$ ; otherwise, the buyer does not source from the supplier. Combining the above cases, our results follow.  $\square$

**Proof (Proposition 3)** According to Proposition 2, it is straightforward to show  $\mu^* = \gamma$  and  $\eta^* = 0$  in region  $\Omega_1$ . In region  $\Omega_2$ , by definition,  $\eta^* = \frac{(1-\gamma)\gamma\varphi Kc}{(\varphi K)^2 - 2(1-\gamma)\varphi Kc + (1-\gamma)c^2} < 1 - \gamma$ , which is decreasing in  $K$ . Similarly, by definition,  $\mu^* = \frac{v-c}{l-v+c} \frac{\gamma(1-\gamma)(\varphi K-c)c}{(1-\gamma)(\varphi K-c)^2 + \gamma(\varphi K)^2} < \gamma$ . Note that  $\text{sgn}\left[\frac{d\mu^*}{dK}\right] = \text{sgn}\left[-(\varphi K)^2 + 2c\varphi K - (1-\gamma)c^2\right]$ . Then, we have our desired results for  $\eta^*$  in respect of  $K$ . Directly from formulations of  $\eta^*$  and  $\mu^*$  derived, we have their respective asymptotic properties as  $K \rightarrow \infty$ .  $\square$

**Proof (Proposition 4)** We can divide the discussion into the following three cases based on regions. In region  $\Omega_1$ , the efficiency loss can be written by  $L = \Pi^0 - \Pi^* + \int_{\lambda^0}^1 (c - cx)dx - \gamma \int_{\lambda^0}^1 (c - cx)dx - (1 - \gamma) \int_{\lambda^*}^1 (c - cx)dx$ . Note that  $\Pi^0 - \Pi^* > 0$ . In what follows, we show that  $\int_{\lambda^0}^1 (c - cx)dx \geq \gamma \int_{\lambda^0}^1 (c - cx)dx + (1 - \gamma) \int_{\lambda^*}^1 (c - cx)dx$ . According to the definition,  $\int_{\lambda^0}^1 (c - cx)dx = \frac{(v-c)^2 c}{2l^2}$ . When  $(K, \gamma)$  falls in  $\Omega_1$ ,  $\gamma \int_{\lambda^0}^1 (c - cx)dx + (1 - \gamma) \int_{\lambda^*}^1 (c - cx)dx = \frac{1}{2}\gamma c + (1 - \gamma) \frac{(v-c)^2 c}{2l^2}$ . Because  $l > 2(v - c)$ , we always have  $L > 0$ . In this case,  $L$  are constant in  $K$ . When  $(K, \gamma)$  falls in  $\Omega_2$ , it can be shown that  $\gamma \int_{\lambda^0}^1 (c - cx)dx + (1 - \gamma) \int_{\lambda^*}^1 (c - cx)dx = \frac{(\varphi K - c + \gamma c)^2 [\varphi^2 K^2 - 2(1-\gamma)\varphi Kc + (1-\gamma)c^2] (v-c)^2 c}{[(\varphi K - c + \gamma c)(\varphi K - c) + \gamma Kc]^2} \frac{(v-c)^2 c}{2l^2}$ . It can be further shown that  $\frac{(\varphi K - c + \gamma c)^2 [\varphi^2 K^2 - 2(1-\gamma)\varphi Kc + (1-\gamma)c^2]}{[(\varphi K - c + \gamma c)(\varphi K - c) + \gamma Kc]^2} \leq 1$  and the equality sign holds if and only if  $\gamma = 1$ . Hence,  $L \geq 0$  and the equality sign holds if and only if  $\gamma = 1$  or 0. Moreover, we can further show that  $L$  is decreasing in  $K$ . Then, the desired results follow.  $\square$

**Proof (Proposition 5)** We start with a general screening contract. Following the analysis in §3.1,  $p_1 \geq c\lambda + (1 - \tau)h$  and  $p_2 \leq c\lambda$  in equilibrium. Then, the buyer's optimization problem can be written as follows

$$\Pi^h = \max_{\substack{0 \leq \lambda \leq 1 \\ p_1 \geq c\lambda + (1-\tau)h \\ 0 \leq p_2 \leq c\lambda}} \left\{ \int_{\lambda}^{\min\{(p_1 - (1-\tau)h)/c, 1\}} (v - l + lx - p_1 - \tau h) dx + \int_0^{\min\{\lambda, p_2/c\}} (v - l + lx - p_2) dx \right\}$$

Let  $(\lambda^h, p_1^h, p_2^h)$  be the optimal solution to the above problem. The following claim summarizes the buyer's equilibrium contracting strategy with in-house audit.

*Claim:* When  $v \leq c + h$ , the buyer does not offer a contract. Otherwise,  $\lambda^h = 1 - (v - c - h)/l$ ,  $p_1^h = c + (1 - \tau)h$  and  $p_2^h = 0$ . In this case, the buyer's equilibrium profit is  $\Pi^h = (v - c - h)^2 / (2l) > 0$ .

*Proof.* According to the assumption of  $l > 2v$  condition,  $\int_0^{p_2/c} (v - l + lx - p_2) dx < 0$  for any  $p_2 > 0$ .

Therefore, the buyer is better off setting  $p_2 = 0$ . With this observation, the buyer's problem can be simplified as  $\Pi^h = \max_{c\lambda + (1-\tau)h \leq p_1 \leq c + (1-\tau)h} \int_{\lambda}^{\frac{p_1 - (1-\tau)h}{c}} (v - l + lx - p_1 - \tau h) dx$ . We denote the buyer's profit by  $\Pi(\lambda, p; h)$ , that is,  $\Pi(\lambda, p; h) = \int_{\lambda}^{\frac{p - (1-\tau)h}{c}} (v - l + lx - p - \tau h) dx$ . We can compute  $\Pi(\lambda, p; h) - \Pi\left(\lambda + 1 - \frac{p - (1-\tau)h}{c}, c + (1-\tau)h; h\right) = \left(\frac{l}{c} - 1\right) \left(\frac{p - (1-\tau)h}{c} - \lambda\right) (p - (1-\tau)h - c) < 0$  for any  $p < c + (1-\tau)h$ , which indicates the buyer's equilibrium contract payment must be  $p^h = c + (1-\tau)h$  if  $\Pi^h > 0$ . By noting  $\frac{\partial^2 \Pi(\lambda, c + (1-\tau)h; h)}{\partial^2 \lambda} < 0$ , we obtain the equilibrium process quality requirement as  $\lambda^h = \min\left(1 - \frac{v-c-h}{l}, 1\right)$  if  $\Pi^h > 0$ . Hence, when  $v > c + h$ ,  $\lambda^h = 1 - \frac{v-c-h}{l}$  and  $\Pi^h = \frac{(v-c-h)^2}{2l}$ ; otherwise, the buyer does not offer a contract.

Based on the above claim, we can see that when  $h > v - c$ , the buyer would never prefer in-house audit. When  $h < v - c$ , in region  $\Omega_0$ , the buyer prefers in-house audit since in-house audit can yield a positive profit. In  $\Omega_1$ , by comparing their respective profits, it can be shown that the buyer prefers in-house audit if and only if  $\gamma > \frac{h(2v-2c-h)}{(v-c-l)^2}$ . Similarly, in  $\Omega_2$ , it can be shown that the buyer prefers in-house audit if and only if  $K < \frac{c\left[(1-\gamma)\sqrt{h(2v-2c-h)} + \sqrt{\gamma(1-\gamma)(v-c-h)}\right]}{\varphi\sqrt{h(2v-2c-h)}}$ . Moreover, it can be further verified that the inequality becomes  $\gamma \geq \left(\frac{v-c-h}{v-c}\right)^2$  when  $K = c/\varphi$ . As a result, the buyer prefers third-party audit when  $\gamma \geq \left(\frac{v-c-h}{v-c}\right)^2$ . Then, we are done.  $\square$

**Proof (Proposition 6)** The result in region  $\Omega_1$  is straightforward since  $\theta^* = \gamma\left(1 - \frac{v-c}{l}\right)$ . In region  $\Omega_2$ , the equilibrium collusion probability can be written as  $\theta^* = \frac{\gamma(\varphi K - c + \gamma c)c}{(\varphi K - c + \gamma c)^2 + \gamma(1-\gamma)c^2} \cdot \frac{v-c}{l}$ . Note that  $\theta^*$  is concave in  $K$  and decreasing in  $K$  if  $K > \left(1 - \gamma + \sqrt{\gamma(1-\gamma)}\right)c/\varphi$ . Also note that  $\left(1 - \gamma + \sqrt{\gamma(1-\gamma)}\right)c \leq c$  if and only if  $\gamma > \frac{1}{2}$ . By noticing  $\lim_{K \rightarrow c/\varphi^+} \gamma(K) < \frac{1}{2}$ , we then can divide the discussion into three cases. Case 1:  $\gamma \geq \frac{1}{2}$ .  $\theta^*$  is decreasing in  $K$  since  $\left(1 - \gamma + \sqrt{\gamma(1-\gamma)}\right)c \leq c$ . Case 2:  $\lim_{K \rightarrow c/\varphi^+} \gamma(K) \leq \gamma < \frac{1}{2}$ . From Proposition 2,  $(K, \gamma) \in \Omega_2$  for any  $K > c/\varphi$ . Note that  $\left(1 - \gamma + \sqrt{\gamma(1-\gamma)}\right)c > c$ . We have  $\theta^*$  is first increasing and then decreasing in  $K$ . Case 3:  $\gamma < \lim_{K \rightarrow c/\varphi^+} \gamma(K)$ . In this case,  $\theta^* = \gamma\left(1 - \frac{v-c}{l}\right)$  if  $K < K'$  and  $\theta^* = \frac{\gamma(\varphi K - c + \gamma c)c}{(\varphi K - c + \gamma c)^2 + \gamma(1-\gamma)c^2} \cdot \frac{v-c}{l}$  if  $K \geq K'$ , where  $\underline{\gamma}(K') = \gamma$ . It can be shown that  $\underline{\gamma}\left(\left(1 - \gamma + \sqrt{\gamma(1-\gamma)}\right)c/\varphi\right) < \gamma$  if and only if  $\gamma < \frac{1}{2} \left(\frac{v-c}{l-v+c}\right)^2$ . Therefore,  $\theta^*$  is first increasing and then decreasing in  $K$  for  $\frac{1}{2} \left(\frac{v-c}{l-v+c}\right)^2 < \gamma < \lim_{K \rightarrow c/\varphi^+} \gamma(K)$  and decreasing in  $K$  for  $\gamma \leq \frac{1}{2} \left(\frac{v-c}{l-v+c}\right)^2$ . Moreover, from Proposition 2, it is straightforward to see that  $\Pi^*$  is increasing in  $K$ . Combining all the above results, we have proved the result of  $\Omega_2$ .  $\square$

## Appendix B: Results and Proofs for §6 (Model Extensions)

The details can be found in the E-Companion of the paper, available at the following website: <http://ssrn.com/abstract=2812209>.
